# Supplementary material for: Candidate Genes for Freezing and Drought Tolerance Selected on the Basis of Proteome Analysis in Doubled Haploid Lines of Barley
Source: PubMed Central journal article supplement (PMC7139788; doi:10.3390/ijms21062062), 2020-03-17
Supplement: ijms-21-02062-s001.pdf [file ijms-21-02062-s001.pdf]

**Table S1.** Comparison of changes in transcripts and proteins accumulation after cold acclimation and drought treatment

| Gene                        | Line  | Direction of change in transcript accumulation after stress treatment | Direction of change in protein accumulation after stress treatment** | Reference for protein accumulation data* |
|-----------------------------|-------|-----------------------------------------------------------------------|----------------------------------------------------------------------|------------------------------------------|
| 14-3-3a                     | DH534 | 1.36-fold increase                                                    | not analyzed                                                         | [8]                                      |
|                             | DH602 | 1.05-fold decrease                                                    | 3-fold increase                                                      | [8]                                      |
|                             | DH158 | 1.3-fold increase                                                     | no change                                                            | [8]                                      |
|                             | DH575 | 2.88-fold increase                                                    | 12-fold decrease                                                     | [8]                                      |
| Elongation factor 1 alpha   | DH534 | 1.09-fold increase                                                    | not analyzed                                                         | [8]                                      |
|                             | DH602 | 1.84-fold increase                                                    | no change                                                            | [8]                                      |
|                             | DH158 | 1.11-fold increase                                                    | no change                                                            | [8]                                      |
|                             | DH575 | 1.67-fold increase                                                    | 21-fold decrease                                                     | [8]                                      |
| Ferredoxin-NADP reductase   | DH534 | 1.78-fold decrease                                                    | not analyzed                                                         | [8]                                      |
|                             | DH602 | 2.2-fold decrease                                                     | 1.5-fold increase                                                    | [8]                                      |
|                             | DH158 | 1.96-fold decrease                                                    | 1.5-fold decrease                                                    | [8]                                      |
|                             | DH575 | 2.06-fold increase                                                    | 13-fold increase                                                     | [8]                                      |
| $\beta$ -fructofuranosidase | DH534 | 12.95-fold decrease                                                   | not analyzed                                                         | [8]                                      |
|                             | DH602 | 37.17-fold decrease                                                   | 13-fold increase                                                     | [8]                                      |
|                             | DH158 | 10.47-fold decrease                                                   | 1.5-fold decrease                                                    | [8]                                      |
|                             | DH575 | 1.84-fold decrease                                                    | 12-fold decrease                                                     | [8]                                      |
| CBF4B                       | DH534 | 1.56-fold increase                                                    | not analyzed                                                         | [8]                                      |
|                             | DH602 | 1.38-fold increase                                                    | 13-fold increase                                                     | [8]                                      |
|                             | DH158 | 1.21-fold increase                                                    | 1.5-fold decrease                                                    | [8]                                      |
|                             | DH575 | 2.87-fold increase                                                    | 12-fold decrease                                                     | [8]                                      |
| CBF2A                       | DH534 | 4.61-fold decrease                                                    | not analyzed                                                         | [8]                                      |
|                             | DH602 | 3.48-fold                                                             | 13-fold increase                                                     | [8]                                      |

|                             |       |                    |                    |     |
|-----------------------------|-------|--------------------|--------------------|-----|
|                             |       | decrease           |                    |     |
|                             | DH158 | 4.71-fold decrease | 1.5-fold decrease  | [8] |
|                             | DH575 | 2.27-fold decrease | 12-fold decrease   | [8] |
| Actin                       | DH534 | 2.21-fold decrease | no change          | [9] |
|                             | DH561 | 1.53-fold decrease | 0,05-fold decrease | [9] |
|                             | DH435 | 1.25-fold decrease | no change          | [9] |
|                             | DH602 | 1.57-fold decrease | 0.4-fold decrease  | [9] |
| Triosephosphate isomerase   | DH534 | 4.64-fold decrease | no change          | [9] |
|                             | DH561 | 3.19-fold decrease | no change          | [9] |
|                             | DH435 | 2.36-fold decrease | no change          | [9] |
|                             | DH602 | 1.95-fold decrease | 12.2-fold increase | [9] |
| Pfam14200                   | DH534 | 2.5-fold decrease  | no change          | [9] |
|                             | DH561 | 2.07-fold decrease | no change          | [9] |
|                             | DH435 | 1.18-fold decrease | no change          | [9] |
|                             | DH602 | 2.35-fold decrease | no change          | [9] |
| GroEs                       | DH534 | 1.79-fold decrease | no change          | [9] |
|                             | DH561 | 1.76-fold decrease | no change          | [9] |
|                             | DH435 | 3.16-fold decrease | no change          | [9] |
|                             | DH602 | 1.64-fold decrease | no change          | [9] |
| periplasmic serine protease | DH534 | 3.95-fold decrease | no change          | [9] |
|                             | DH561 | 2.04-fold decrease | no change          | [9] |
|                             | DH435 | 1.67-fold decrease | 0.5-fold decrease  | [9] |
|                             | DH602 | 1.44-fold decrease | 0.4-fold decrease  | [9] |
| Transketolase               | DH534 | 3.19-fold decrease | no change          | [9] |
|                             | DH561 | 2.55-fold decrease | no change          | [9] |

|  |       |                    |                   |     |
|--|-------|--------------------|-------------------|-----|
|  | DH435 | 1.65-fold decrease | 2.9-fold increase | [9] |
|  | DH602 | 1.55-fold decrease | 0.5-fold decrease | [9] |

\* The data of the direction of change in protein accumulation after stress treatment were used to present the tolerant vs susceptible lines ratio in those papers

\*\* Where 'no change' is indicated, the difference between susceptible and tolerant lines were observed after stress treatment, but there were no changes before and after stress-treatment in a particular line
